# Supplementary material for: Evaluation of Tissue and Circulating miR-21 as Potential Biomarker of Response to Chemoradiotherapy in Rectal Cancer
Source: PubMed Central journal article supplement (PMC7559906; doi:10.3390/ph13090246), 2020-09-14
Supplement: pharmaceuticals-13-00246-s001.pdf [file pharmaceuticals-13-00246-s001.pdf]

## SUPPLEMENTARY MATERIALS

*Article*

# Evaluation of Tissue and Circulating miR-21 as Potential Biomarker of Response to Chemoradiotherapy in Rectal Cancer

Susana Ourô<sup>1,2,†,\*</sup>, Cláudia Mourato<sup>3,†</sup>, Marisa P. Ferreira<sup>1</sup>, Diogo Albergaria<sup>1</sup>, André Cardador<sup>3</sup>, Rui E. Castro<sup>3</sup>, Rui Maio<sup>1,2</sup> and Cecília M. P. Rodrigues<sup>3,\*</sup>

<sup>1</sup> Surgical Department, Hospital Beatriz Ângelo, 2674-514 Loures, Portugal; marisa.hferreira@hbeatrizangelo.pt (M.P.F.); diogo.albergaria@hbeatrizangelo.pt (D.A.); rui.maio@hbeatrizangelo.pt (R.M.)

<sup>2</sup> NOVA Medical School, Faculdade de Ciências Médicas, 1169-056 Lisboa, Portugal

<sup>3</sup> Research Institute for Medicines (iMed.Ulisboa), Faculty of Pharmacy, Universidade de Lisboa, 1649-003 Lisboa, Portugal; cmourato@ff.ulisboa.pt (C.M.); acardador@campus.ul.pt (A.C.); ruieduardocastro@ff.ulisboa.pt (R.E.C.)

\* Correspondence: smrouro@gmail.com (S.O.); cmprodrigues@ff.ulisboa.pt (C.M.P.R.)

† These authors contributed equally to this work.

## Figure

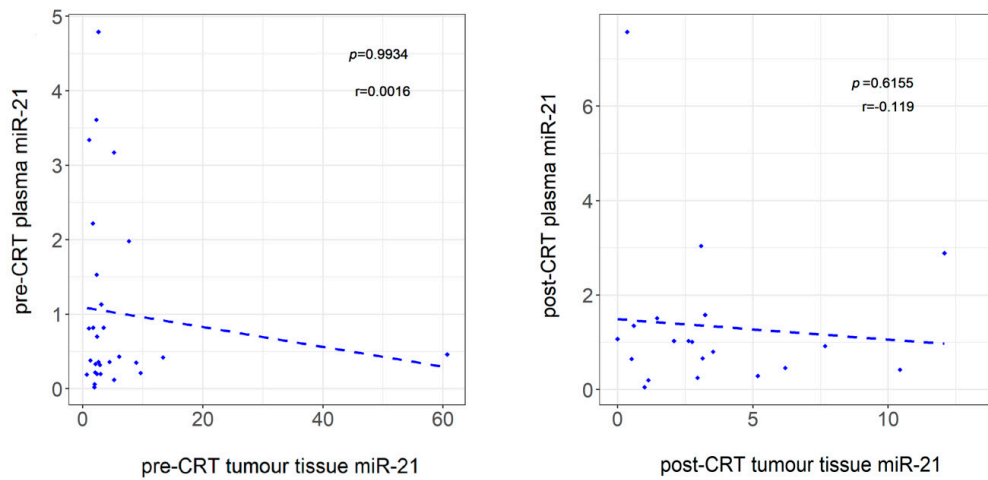

**Figure S1.** Correlation between pre- and post-CRT miR-21 expression in plasma and tumor tissue.

## Table

**Table S1.** Predictive value of miR-21 cut-off.

| miR-21 Cut-Off  | Pre-CRT<br>Tumor Tissue<br>2.61 | Pre-CRT Non-<br>Neoplastic<br>Tissue<br>1.2 | Pre-CRT<br>Serum<br>0.54 | Post-CRT<br>Serum<br>0.84 |
|-----------------|---------------------------------|---------------------------------------------|--------------------------|---------------------------|
| Sensitivity (%) | 53                              | 56                                          | 44                       | 50                        |
| Specificity (%) | 47                              | 57                                          | 47                       | 53                        |
| PPV (%)         | 53                              | 60                                          | 50                       | 56                        |
| NPV (%)         | 47                              | 53                                          | 41                       | 47                        |

Cut-off derived by ROC curve. miR-21 estimated cut-points: 2.61 in pre-CRT tumour tissue; 1.2 in pre-CRT non-neoplastic tissue; 0.54 in pre-CRT serum; 0.84 in post-CRT serum. PPV: positive predictive value; NPV: negative predictive value.
